# Supplementary material
Source: publisher figshare collection journal article supplement (https://acs.figshare.com/ndownloader/files/25683959)
Supplement: Supplementary file 1 [file 25683959]

## Supplementary information

### **Aquatic macrophytes in morphological and physiological responses to the nanobubble technology application for water restoration**

**Shuo Wang<sup>†</sup>, Yunsu Liu<sup>†</sup>, Tao Lyu<sup>‡</sup>, Gang Pan<sup>\*,§</sup>, Pan Li<sup>\*,†,||</sup>**

<sup>†</sup>*School of Environmental Science and Engineering, Tongji University, 1239 Siping Road, Shanghai, PR China.*

<sup>‡</sup>*Cranfield Water Science Institute, Cranfield University, College Road, Cranfield, Bedfordshire, MK43 0AL, UK*

<sup>§</sup>*Integrated Water-Energy-Food Facility (iWEF), School of Animal, Rural, and Environmental Sciences, Nottingham Trent University, Nottinghamshire NG25 0QF, UK*

<sup>||</sup>*School of Environmental Science and Engineering, State Key Laboratory of Control and Resource Reuse, Tongji University, 1239 Siping Road, Shanghai, PR China.*

*\*Corresponding authors: [lipan@tongji.edu.cn](mailto:lipan@tongji.edu.cn) (P. Li); [gang.pan@ntu.ac.uk](mailto:gang.pan@ntu.ac.uk) (G. Pan).*

The SI contains 5 pages, which has 3 Figures and 2 Tables.

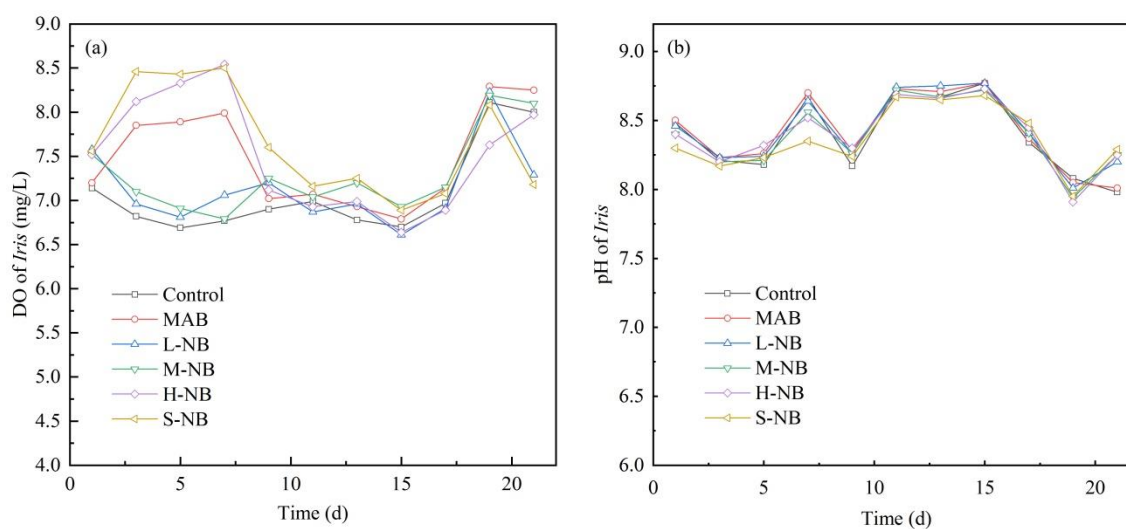

**Figure S1.** Changes in (a) DO level and (b) pH in water over the 21 days of cultivation of *Iris*. MAB, L-NB, M-NB, H-MB, S-NB represent macrobubble aeration, low, medium, high and super-high nanobubble aeration groups, respectively.

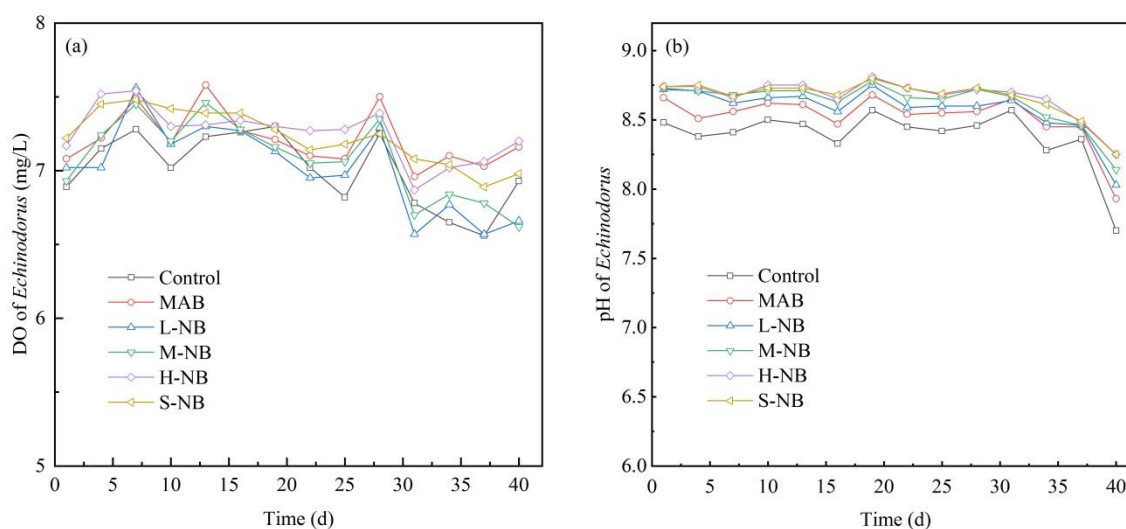

**Figure S2.** Changes in (a) DO level and (b) pH in the nutrient solution during the 40 days of cultivation of *Echinodorus*. MAB, L-NB, M-NB, H-MB, S-NB represent macrobubble aeration, low, medium, high and super-high nanobubble aeration groups, respectively.

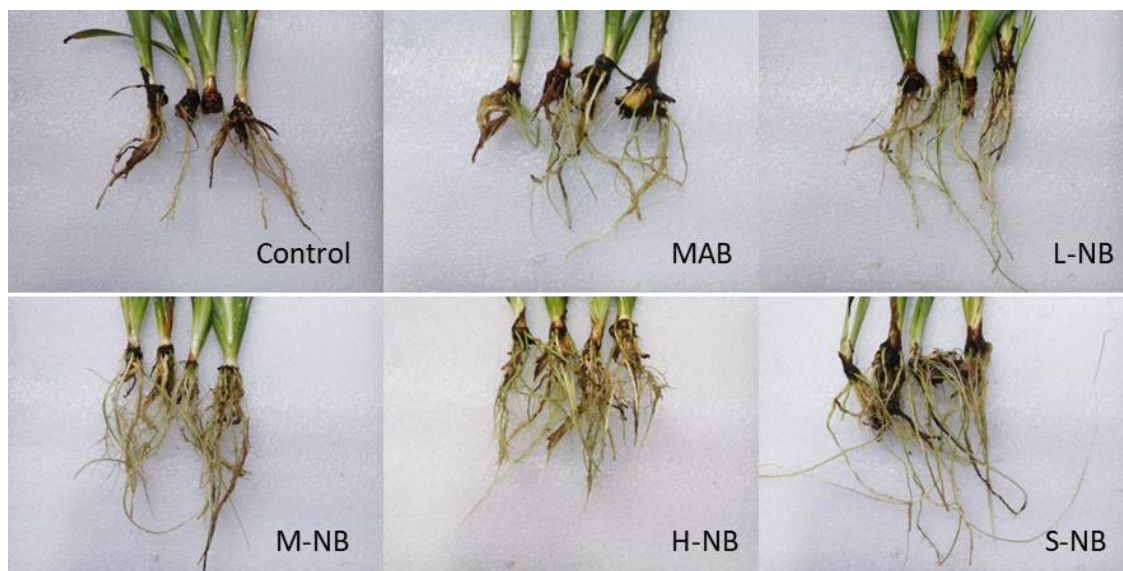

**Figure S3.** The appearance of *Iris* root at the end of the experiment. MAB, L-NB, M-NB, H-MB, S-NB represent macrobubble aeration, low, medium, high and super-high nanobubble aeration groups, respectively.

**Table S1**

Significantly enriched Gene Ontology (GO) classification of DEGs in *Iris* for MAB group vs. H-NB group (P-value < 0.05).

| Description                                                                                                                   | Up  | Down | Term_type          |
|-------------------------------------------------------------------------------------------------------------------------------|-----|------|--------------------|
| heme binding                                                                                                                  | 33  | 12   | molecular_function |
| tetrapyrrole binding                                                                                                          | 33  | 12   | molecular_function |
| iron ion binding                                                                                                              | 28  | 14   | molecular_function |
| oxidoreductase activity, acting on paired donors, with incorporation or reduction of molecular oxygen                         | 28  | 11   | molecular_function |
| chitinase activity                                                                                                            | 6   | 0    | molecular_function |
| nutrient reservoir activity                                                                                                   | 5   | 4    | molecular_function |
| intramolecular lyase activity                                                                                                 | 6   | 1    | molecular_function |
| endopeptidase inhibitor activity                                                                                              | 5   | 8    | molecular_function |
| endopeptidase regulator activity                                                                                              | 5   | 8    | molecular_function |
| peptidase inhibitor activity                                                                                                  | 5   | 8    | molecular_function |
| peptidase regulator activity                                                                                                  | 5   | 8    | molecular_function |
| enzyme inhibitor activity                                                                                                     | 12  | 10   | molecular_function |
| methionine adenosyltransferase activity                                                                                       | 5   | 0    | molecular_function |
| O-methyltransferase activity                                                                                                  | 12  | 2    | molecular_function |
| oxidoreductase activity, acting on single donors with incorporation of molecular oxygen, incorporation of two atoms of oxygen | 4   | 6    | molecular_function |
| serine-type endopeptidase inhibitor activity                                                                                  | 4   | 4    | molecular_function |
| oxidoreductase activity                                                                                                       | 103 | 46   | molecular_function |
| release of cytochrome c from mitochondria                                                                                     | 2   | 1    | biological_process |
| chitin catabolic process                                                                                                      | 7   | 0    | biological_process |
| amino sugar catabolic process                                                                                                 | 7   | 0    | biological_process |
| glucosamine-containing compound catabolic process                                                                             | 7   | 0    | biological_process |
| S-adenosylmethionine biosynthetic process                                                                                     | 5   | 0    | biological_process |
| cellular transition metal ion homeostasis                                                                                     | 2   | 3    | biological_process |
| chitin metabolic process                                                                                                      | 7   | 0    | biological_process |
| glucosamine-containing compound metabolic process                                                                             | 7   | 0    | biological_process |
| transition metal ion homeostasis                                                                                              | 2   | 3    | biological_process |
| cell wall macromolecule catabolic process                                                                                     | 6   | 0    | biological_process |
| response to stress                                                                                                            | 46  | 29   | biological_process |
| defense response                                                                                                              | 18  | 5    | biological_process |
| oxidation-reduction process                                                                                                   | 103 | 38   | biological_process |

**Table S2**

Significantly enriched Gene Ontology (GO) classification of DEGs in *Echinodorus* for MAB group vs. S-NB group (P-value < 0.05).

| Description                                   | Up  | Down | Term_type          |
|-----------------------------------------------|-----|------|--------------------|
| structural constituent of ribosome            | 159 | 127  | molecular_function |
| structural molecule activity                  | 178 | 197  | molecular_function |
| oxidoreductase activity                       | 133 | 378  | molecular_function |
| peptidase inhibitor activity                  | 11  | 35   | molecular_function |
| peptidase regulator activity                  | 11  | 35   | molecular_function |
| ribosome biogenesis                           | 173 | 142  | biological_process |
| ribonucleoprotein complex biogenesis          | 173 | 142  | biological_process |
| cellular component biogenesis                 | 216 | 216  | biological_process |
| peptide biosynthetic process                  | 169 | 164  | biological_process |
| translation                                   | 169 | 158  | biological_process |
| amide biosynthetic process                    | 179 | 184  | biological_process |
| peptide metabolic process                     | 172 | 168  | biological_process |
| oxidation-reduction process                   | 131 | 359  | biological_process |
| organonitrogen compound biosynthetic process  | 228 | 282  | biological_process |
| cellular amide metabolic process              | 183 | 195  | biological_process |
| cellular component organization or biogenesis | 263 | 336  | biological_process |
| organonitrogen compound metabolic process     | 314 | 467  | biological_process |
| metabolic process                             | 794 | 1580 | biological_process |
| photosynthesis                                | 12  | 93   | biological_process |
| ribonucleoprotein complex                     | 173 | 169  | cellular_component |
| ribosome                                      | 168 | 141  | cellular_component |
| macromolecular complex                        | 352 | 672  | cellular_component |
| thylakoid                                     | 14  | 97   | cellular_component |
| thylakoid part                                | 14  | 97   | cellular_component |
| photosynthetic membrane                       | 12  | 92   | cellular_component |
| photosystem                                   | 11  | 86   | cellular_component |
| thylakoid membrane                            | 5   | 47   | cellular_component |
| photosystem II oxygen evolving complex        | 3   | 40   | cellular_component |
| photosystem II                                | 7   | 63   | cellular_component |
| intracellular non-membrane-bounded organelle  | 229 | 249  | cellular_component |
